# Supplementary material for: Impact of visual acuity on developing literacy at age 4–5 years: a cohort-nested cross-sectional study
Source: HighWire-hosted journal article supplement (doi:10.1136/bmjopen-2015-010434), 2016-02-01
Supplement: bmjopen-2015-010434supp_tables.pdf [file bmjopen-2015-010434supp_tables.pdf]

Table S1. Comparison of Born in Bradford (BiB) Children with Non-Born in Bradford Children.

| <b>Characteristic</b>               | <b>All children</b><br>mean (SD) (range) | <b>Non-BiB children</b><br>mean (SD) | <b>BiB children</b><br>mean (SD) | <b>Mean Difference</b><br><b>(95% CI)</b> |
|-------------------------------------|------------------------------------------|--------------------------------------|----------------------------------|-------------------------------------------|
| Letter ID score                     | 105.64 (12.78) (68-143)<br>n=6249        | 104.7 (12.98)<br>n=3320              | 106.7 (12.46)<br>n=2929          | -1.99<br>(-2.62 to -1.36 )                |
| British Picture<br>Vocabulary Score | 99.03 (16.43) (39 to 161)<br>n=6160      | 97.96 (17.55)<br>n=3268              | 100.23 (14.97)<br>n=2892         | -2.28<br>(-3.09 to -1.46)                 |
| Visual Acuity (logMAR)              | 0.137 (0.09) (0 to 1.0)<br>n= 12083      | 0.139 (0.09)<br>n=7215               | 0.134 (0.09)<br>n=4868           | 0.005<br>(0.002 to 0.008)                 |
| Mean Spherical Error<br>(Dioptres)  | 1.05 (0.69) (-5.6 to +9.74)<br>n=11483   | 1.04 (0.71)<br>n=6871                | 1.06 (0.67)<br>n=4612            | 0.02<br>(-0.046 to 0.005)                 |

Table S2. Associations between Literacy (Letter Identification Score) and Visual Acuity, British Picture Vocabulary Scale (BPVS), Socio-economic and Demographic (child and maternal) factors n=1979 children n= 74 school

| <b>FACTOR</b>                                                      | <b>UNADJUSTED</b><br>mean difference in literacy scores (95% CI) | <b>ADJUSTED BPVS</b><br>mean difference in literacy scores (95% CI) | <b>ADJUSTED DEMOGRAPHIC</b><br>mean difference in literacy scores (95% CI) * | <b>ADJUSTED SOCIOECONOMIC</b><br>mean difference in literacy scores (95% CI) ** | <b>FULLY ADJUSTED MODEL</b><br>mean difference in literacy scores (95% CI) *** |
|--------------------------------------------------------------------|------------------------------------------------------------------|---------------------------------------------------------------------|------------------------------------------------------------------------------|---------------------------------------------------------------------------------|--------------------------------------------------------------------------------|
| change in literacy score per 1 line (0.1log unit) of Visual Acuity | -2.41 (-2.97 to -1.85)<br>p<0.001                                | -1.83 (-2.37 to -1.29)<br>p<0.001                                   | -1.76 (-2.29 to -1.23)<br>p<0.001                                            | -1.76 (-2.29 to -1.23)<br>p<0.001                                               | -1.69 (-2.21 to -1.16)<br>p<0.001                                              |
| change in literacy score per 1 unit change in BPVS                 |                                                                  | 0.26 (0.23 to 0.30)<br>p<0.001                                      | 0.26 (0.22 to 0.30)<br>p<0.001                                               | 0.25 (0.21 to 0.29)<br>p<0.001                                                  | 0.24 (0.21 to 0.28)<br>p<0.001                                                 |
| <b>Ethnicity</b>                                                   |                                                                  |                                                                     |                                                                              |                                                                                 |                                                                                |
| White British                                                      |                                                                  |                                                                     | reference                                                                    |                                                                                 | reference                                                                      |
| Pakistani                                                          |                                                                  |                                                                     | 1.08 (-0.56 to 2.72) p=0.196                                                 |                                                                                 | 0.10 (-1.6 to 1.8) p= 0.91                                                     |
| Other                                                              |                                                                  |                                                                     | 3.78 (1.84 to 5.73) p<0.001                                                  |                                                                                 | 2.86 (0.88 to 4.84) p=0.005                                                    |
| <b>Sex at birth</b>                                                |                                                                  |                                                                     |                                                                              |                                                                                 |                                                                                |
| Male                                                               |                                                                  |                                                                     | reference                                                                    |                                                                                 | reference                                                                      |
| Female                                                             |                                                                  |                                                                     | 2.8 (1.82 to 3.79) p<0.001                                                   |                                                                                 | 2.86 (1.88 to 3.84) p<0.001                                                    |
| <b>Birth weight (g)</b>                                            |                                                                  |                                                                     | 0.001 (0.0003 to 0.003)<br>p=0.015                                           |                                                                                 | 0.001 (0.0002 to 0.002) p=0.021                                                |
| <b>Gestational age (weeks)</b>                                     |                                                                  |                                                                     | 0.046 (-0.32 to 0.41) p=0.806                                                |                                                                                 | 0.027 (-0.33 to 0.39) p=0.883                                                  |
| <b>Questionnaire Language</b>                                      |                                                                  |                                                                     |                                                                              |                                                                                 |                                                                                |
| English                                                            |                                                                  |                                                                     | 1.94 (0.35 to 3.52) p=0.016                                                  |                                                                                 | 1.8 (0.22 to 3.4) p=0.026                                                      |
| Other language                                                     |                                                                  |                                                                     | reference                                                                    |                                                                                 | reference                                                                      |
| <b>UK born</b>                                                     |                                                                  |                                                                     |                                                                              |                                                                                 |                                                                                |
| Yes                                                                |                                                                  |                                                                     | 1.33 (-0.15 to 2.81) p=0.077                                                 |                                                                                 | 1.12 (-0.35 to 2.59) p=0.14                                                    |
| No                                                                 |                                                                  |                                                                     | reference                                                                    |                                                                                 | reference                                                                      |
| <b>Receiving Benefits</b>                                          |                                                                  |                                                                     |                                                                              |                                                                                 |                                                                                |
| Yes                                                                |                                                                  |                                                                     |                                                                              | -0.98 (-2.0 to 0.05) p=0.062                                                    | -0.96 (-1.97 to 0.05) p=0.063                                                  |
| No                                                                 |                                                                  |                                                                     |                                                                              | reference                                                                       | reference                                                                      |
| <b>Level of Education</b>                                          |                                                                  |                                                                     |                                                                              |                                                                                 |                                                                                |
| Low (<5 GCSE equivalent & unknown)                                 |                                                                  |                                                                     |                                                                              | reference                                                                       | reference                                                                      |
| Medium (5 GCSE & A level equivalent)                               |                                                                  |                                                                     |                                                                              | 0.99 (-0.19 to 2.16) p=0.099                                                    | 0.96 (-0.22 to 2.15) p=0.11                                                    |
| High (higher than A-level)                                         |                                                                  |                                                                     |                                                                              | 3.00 (1.49 to 4.50) p<0.001                                                     | 2.91 (1.4 to 4.41) p<0.001                                                     |
| <b>Smoked in pregnancy</b>                                         |                                                                  |                                                                     |                                                                              |                                                                                 |                                                                                |
| Yes                                                                |                                                                  |                                                                     |                                                                              | -2.38 (-3.87 to -0.88) p=0.002                                                  | -1.94 (-3.5 to -0.36) p=0.016                                                  |
| No                                                                 |                                                                  |                                                                     |                                                                              | reference                                                                       | reference                                                                      |

\*Demographic adjustment includes; Visual Acuity, BPVS, ethnicity, sex at birth, birth weight, gestational age, language of baseline questionnaire, mothers place of birth.

\*\*Socioeconomic adjustment includes; Visual Acuity, BPVS, receipt of benefits, level of mothers' education, mother smoked during pregnancy.

\*\*\*Fully adjusted analysis includes all factors Visual Acuity, BPVS, ethnicity, sex at birth, birth weight, gestational age, language of baseline questionnaire, mothers place of birth, receipt of benefits, level of mothers education ,mother smoked during pregnancy.
